# Supplementary material for: Isomerization of glucose to fructose catalyzed by lithium bromide in water
Source: Royal Society of Chemistry journal article supplement (doi:10.1039/c7gc02145c), 2017-01-01
Supplement: c7gc02145c1.pdf [file c7gc02145c1.pdf]

## Electronic Supplementary Information

### Isomerization of Glucose to Fructose Catalyzed by Lithium Bromide in Water

Chang Geun Yoo<sup>†</sup>, Ning Li<sup>†</sup>, Melanie Swannell, and Xuejun Pan\*

Department of Biological Systems Engineering, University of Wisconsin-Madison, Madison, WI 53706, United States

<sup>†</sup> These authors contributed equally to this work.

\* Corresponding author:

Email: [xpan@wisc.edu](mailto:xpan@wisc.edu)

Phone: 608-262-4951

Fax: 608-262-1228

**Table S1.** Products from glucose isomerization in in LiCl and LiI

|                        | Time<br>[min] | Glucose<br>[%] | Mannose<br>[%] | Fructose<br>[%] | Decomposition products<br>[%] |
|------------------------|---------------|----------------|----------------|-----------------|-------------------------------|
| LiCl·3H <sub>2</sub> O | 30            | 79.6           | 0.7            | 17.4            | 2.3                           |
|                        | 60            | 76.4           | 0.7            | 16.8            | 6.1                           |
| LiI·3H <sub>2</sub> O  | 15            | 9.8            | 3.8            | 21.4            | 65.0                          |
|                        | 30            | 11.7           | 3.4            | 21.2            | 63.7                          |

Note: starting glucose concentration was 10 g/L; at 120 °C.

**Table S2.** Yields of organic acids from glucose at 120 °C in molten salt hydrates

|             | Glucose<br>[wt%] | Mannose<br>[wt%] | Fructose<br>[wt%] | Lactic acid<br>[wt%] | Formic acid<br>[wt%] | Levulinic acid<br>[wt%] |
|-------------|------------------|------------------|-------------------|----------------------|----------------------|-------------------------|
| LiCl_15 min | ND               | ND               | ND                | 37.8                 | 10.8                 | 19.6                    |
| LiCl_30 min | ND               | ND               | ND                | 39.1                 | 10.6                 | 27.1                    |
| LiBr_15 min | 1.4              | 0.2              | 1.7               | 9.6                  | 12.1                 | 14.6                    |

Note: starting glucose concentration was 10 g/L; NaOH concentrations in LiCl·3H<sub>2</sub>O and LiBr·3H<sub>2</sub>O were 125 and 100 mM, respectively. ND – not detected.

**Table S3.** Glucose conversion rate ( $R_G$ ) and fructose formation rate ( $R_F$ ) in different halide salt hydrates

| Halide salt       | Residual glucose [%] | Fructose yield [%] | $R_G \times 10^4$ [M/s]* | $R_F \times 10^4$ [M/s]* |
|-------------------|----------------------|--------------------|--------------------------|--------------------------|
| LiCl              | 90.5                 | 7.7                | 0.06                     | 0.05                     |
| LiBr              | 48.2                 | 30.3               | 0.32                     | 0.19                     |
| LiI               | 9.8                  | 21.4               | 0.56                     | 0.13                     |
| CaBr <sub>2</sub> | 5.6                  | 22.4               | 0.59                     | 0.14                     |
| ZnCl <sub>2</sub> | 67.1                 | 0                  | 0.20                     | 0.00                     |

Note: starting glucose concentration 10 g/L at 120 °C for 15 min. \* Average rate during the first 15 min, mole/second.

**Table S4.** Glucose conversion rate ( $R_G$ ) and fructose formation rate ( $R_F$ ) at different temperatures

|       | 110 °C            |                   | 120 °C            |                   | 130 °C            |                   | 140 °C            |                   |
|-------|-------------------|-------------------|-------------------|-------------------|-------------------|-------------------|-------------------|-------------------|
| t     | $R_G \times 10^4$ | $R_F \times 10^4$ |
| [min] | [M/s]             |
| 0     |                   |                   |                   |                   |                   |                   |                   |                   |
| 5     | 0.49              | 0.19              | 0.64              | 0.45              | 0.93              | 0.56              | 0.99              | 0.57              |
| 15    | 0.30              | 0.16              | 0.34              | 0.19              | 0.32              | 0.17              | 0.38              | 0.15              |
| 30    | 0.16              | 0.09              | 0.18              | 0.09              | 0.19              | 0.07              | 0.23              | 0.03              |
| 60    | 0.09              | 0.05              | 0.10              | 0.04              | 0.11              | 0.02              | 0.12              | 0.00              |
| 120   | 0.05              | 0.02              | 0.06              | 0.01              | 0.06              | 0.00              | 0.06              | 0.00              |

Note: starting glucose concentration 10 g/L in LiBr·3H<sub>2</sub>O. Average rate, mole/second.

**Table S5.** Conversion rate and isomer formation rate of different starting sugars

| Starting material | $R_G \times 10^4$ [M/s] | $R_F \times 10^4$ [M/s] | $R_M \times 10^4$ [M/s] |
|-------------------|-------------------------|-------------------------|-------------------------|
| Glucose           | 0.64                    | 0.45                    | 0.01                    |
| Fructose          | 0.22                    | 0.42                    | 0.08                    |
| Mannose           | 0.05                    | 0.49                    | 0.72                    |

Note: starting sugar concentration 10 g/L in LiBr·3H<sub>2</sub>O at 120 °C for 5 min. Average rate during the first 5 min, mole/second.

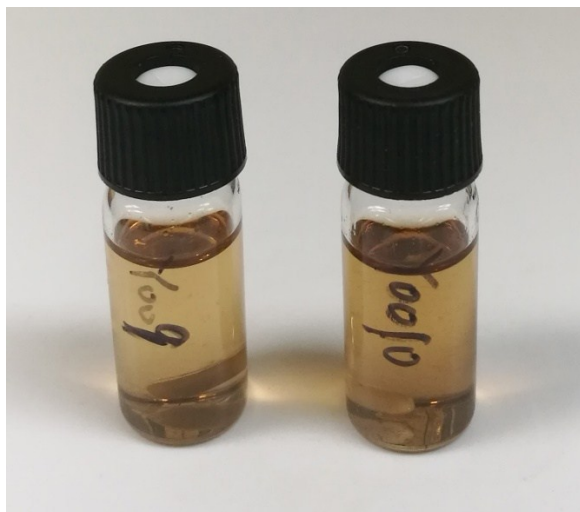

**Figure S1.**  $\text{LiI} \cdot 3\text{H}_2\text{O}$  turned brown after reaction with glucose at 120 °C (Left: 15 min; right: 30 min).

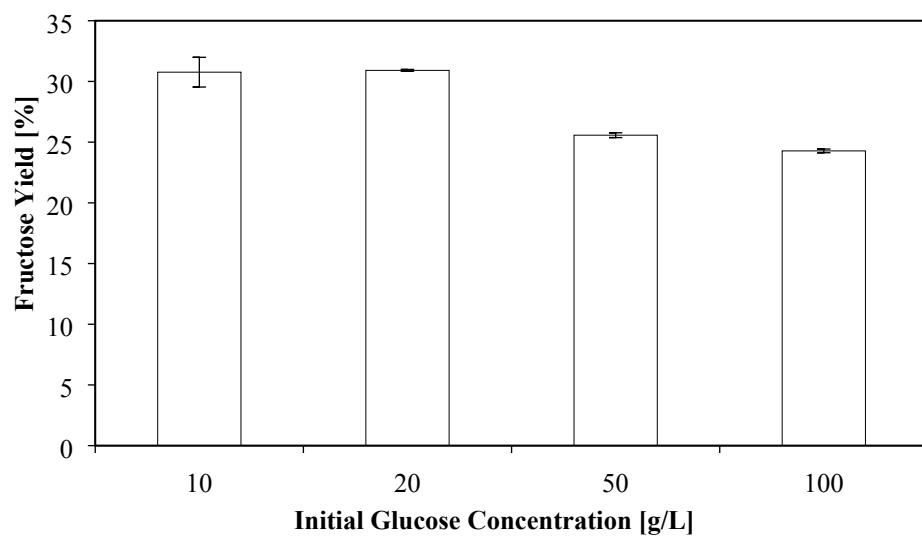

**Figure S2.** Isomerization of glucose with different starting glucose concentration in  $\text{LiBr} \cdot 3\text{H}_2\text{O}$ . Reaction conditions: 120 °C and 15 min.

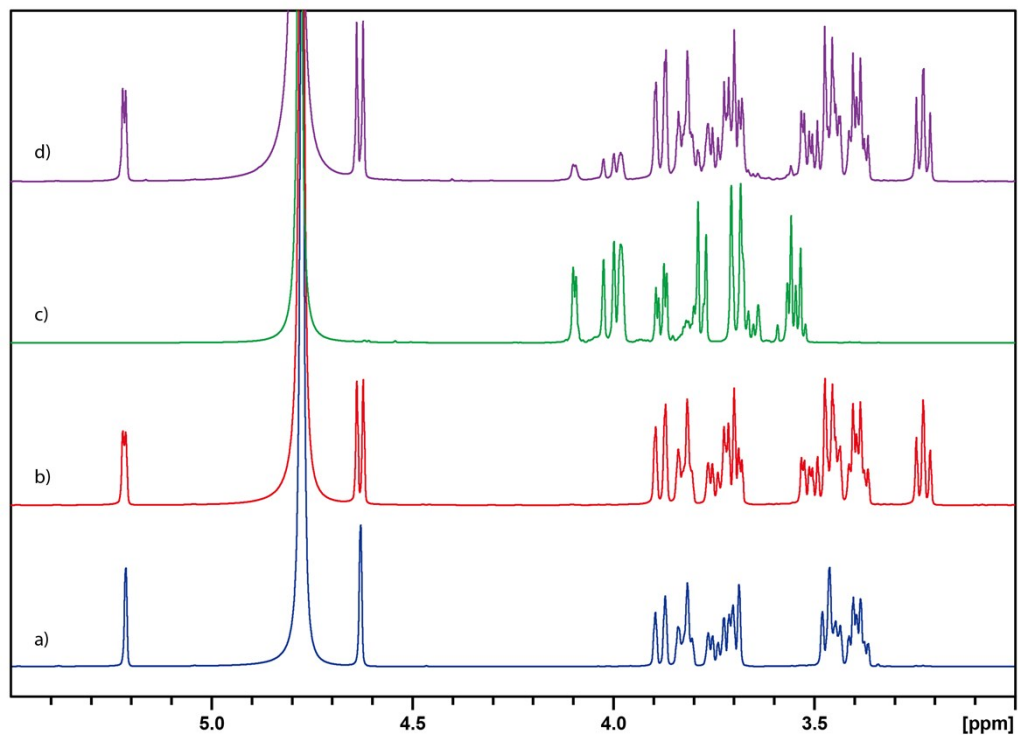

**Figure S3.**  $^1\text{H}$  spectra of a) glucose-2- $d_1$ , b) unlabeled glucose, c) unlabeled fructose, and d) mixed sugars (glucose and fructose) from the isomerization of unlabeled glucose in deuterated LiBr trihydrate.

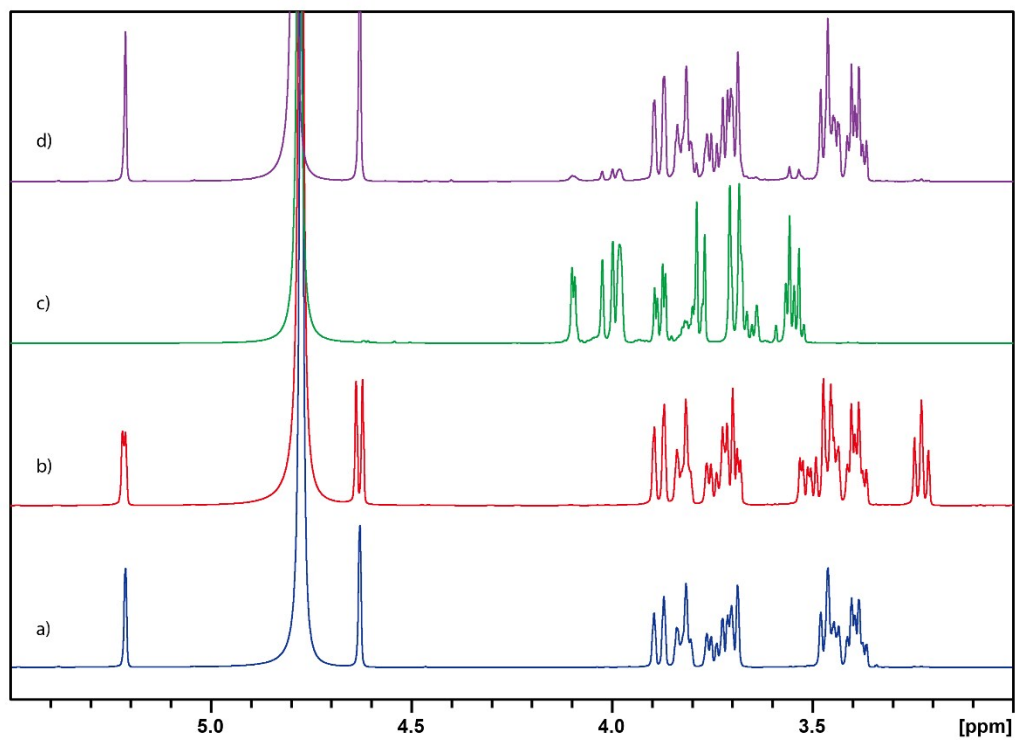

**Figure S4.**  $^1\text{H}$  spectra of a) glucose-2- $d_1$ , b) unlabeled glucose, c) unlabeled fructose, and d) mixed sugars (glucose and fructose) from the isomerization of glucose-2- $d_1$  in LiBr trihydrate.

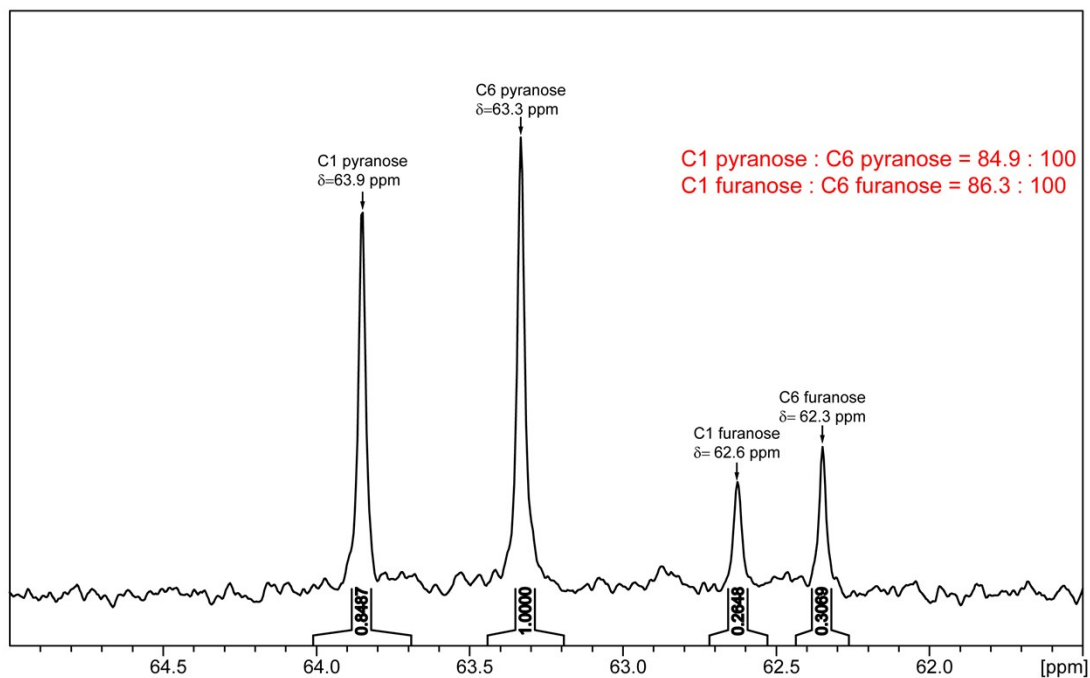

**Figure S5.** Quantitative  $^{13}\text{C}$  NMR spectrum of the mixed sugars (glucose and fructose) from the isomerization of glucose-2- $d_1$  in LiBr trihydrate.

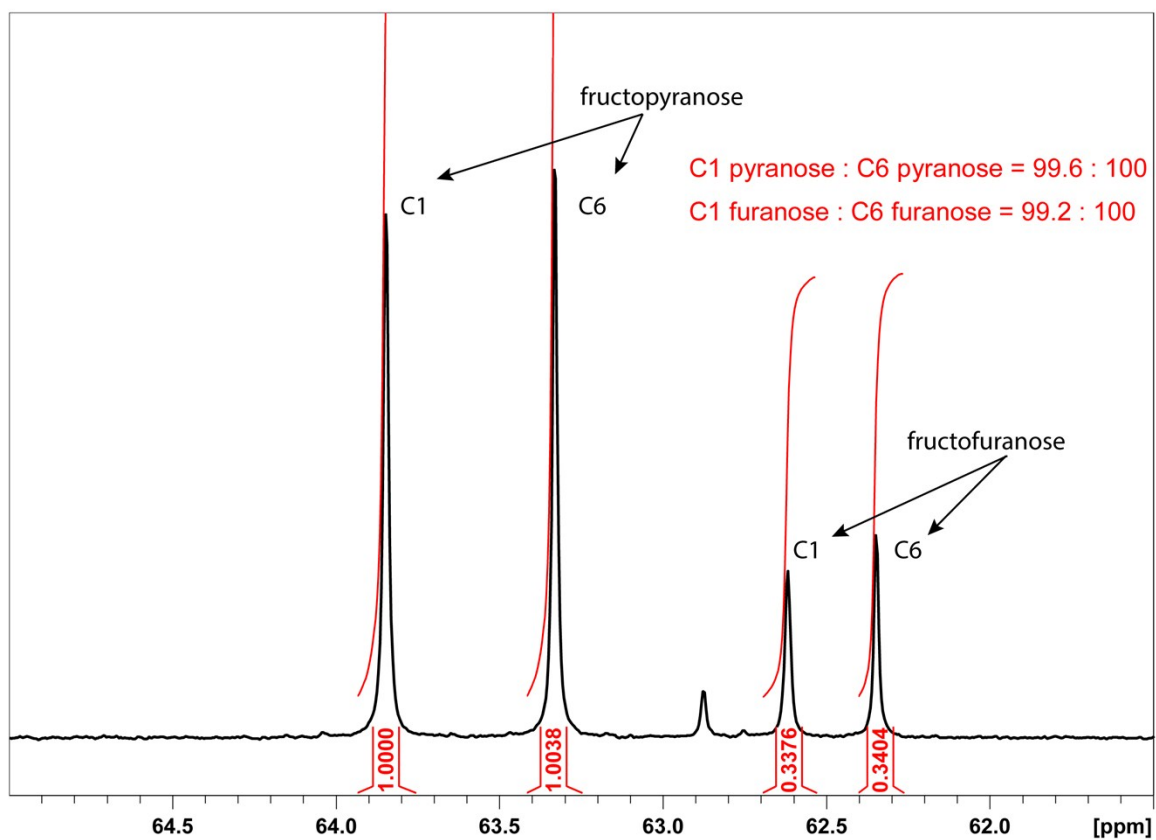

**Figure S6.** Quantitative  $^{13}\text{C}$  NMR spectrum of unlabeled fructose in  $\text{D}_2\text{O}$ .
